# Supplementary material
Source: publisher site journal article supplement (https://www.dovepress.com/article/442921)
Supplement: Supplementary file 1 [file get_supplementary_file.php]

**Supporting Information**

**Integrin avb3 and LHRH Receptor double Directed Nano-analogue Effective Against Ovarian Cancer in Mice Model**

*Na Qi 1,2#，Xiantai Zhou*2*#，Ningzhu Ma2， Jianguo Zhang2，Zhenlin Wang 2，Xin Zhang1*，Aimin Li1**

1 Cancer Center, Integrated Hospital of Traditional Chinese Medicine, Southern Medical University, Guangzhou, 510315, China;

2 Department of Pharmacy, Guilin Medical University, Guilin, 541004, China;

#These authors contribute equally to this work.

*Corresponding author: *Aimin Li*; *Xin Zhang,* Cancer Center, Integrated Hospital of Traditional Chinese Medicine, Southern Medical University, Guangzhou, 510315, China; Email: liaimin2005@163.com； Email: 252089553@qq.com.

**Supporting Information Figure of Contents**

**Figure. S1** Time-of-Flight Mass Spectrometry of DSPE-PEG2000-LHRHa **S-2**

**Figure.S2** HE staining of HE staining of heart, liver, spleen, lung and kidney **S-3**

tissue. Magnification X200.


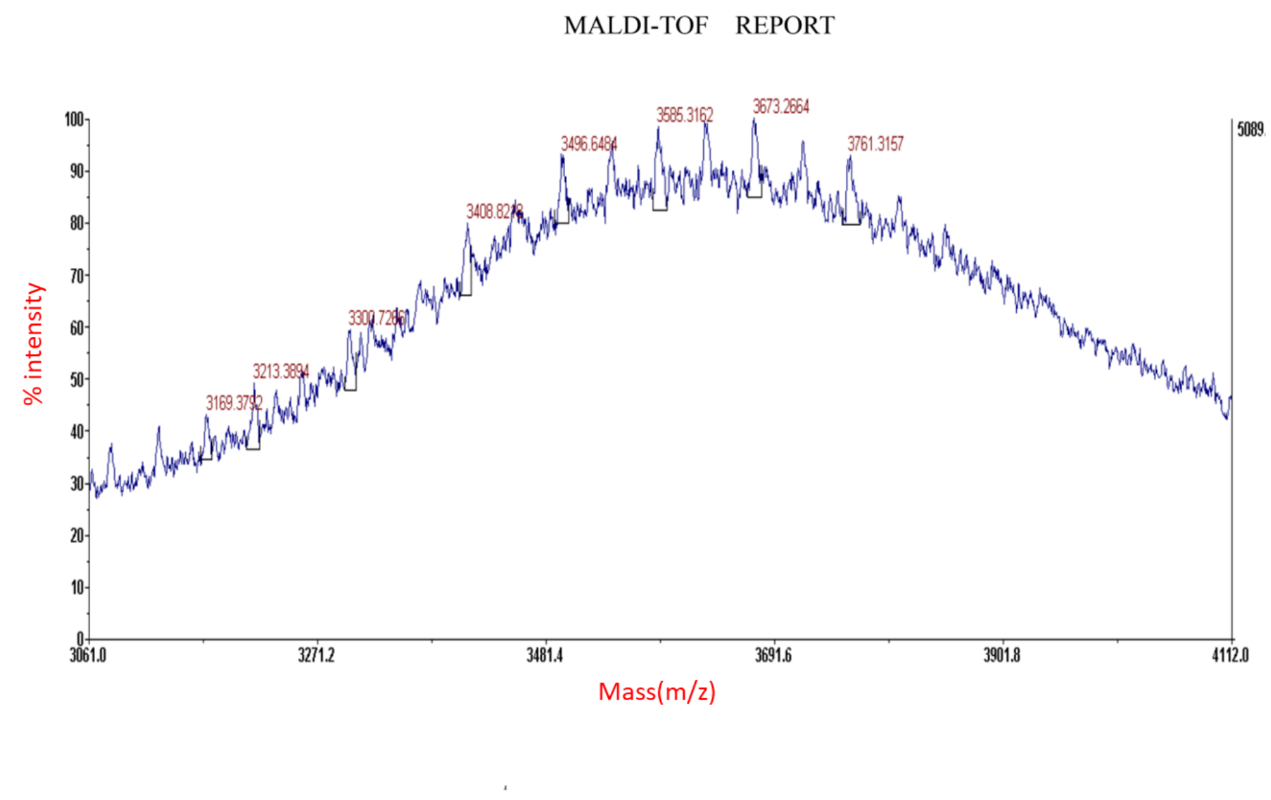


**Figure S1** Time-of-Flight Mass Spectrometry of DSPE-PEG2000-LHRHa.


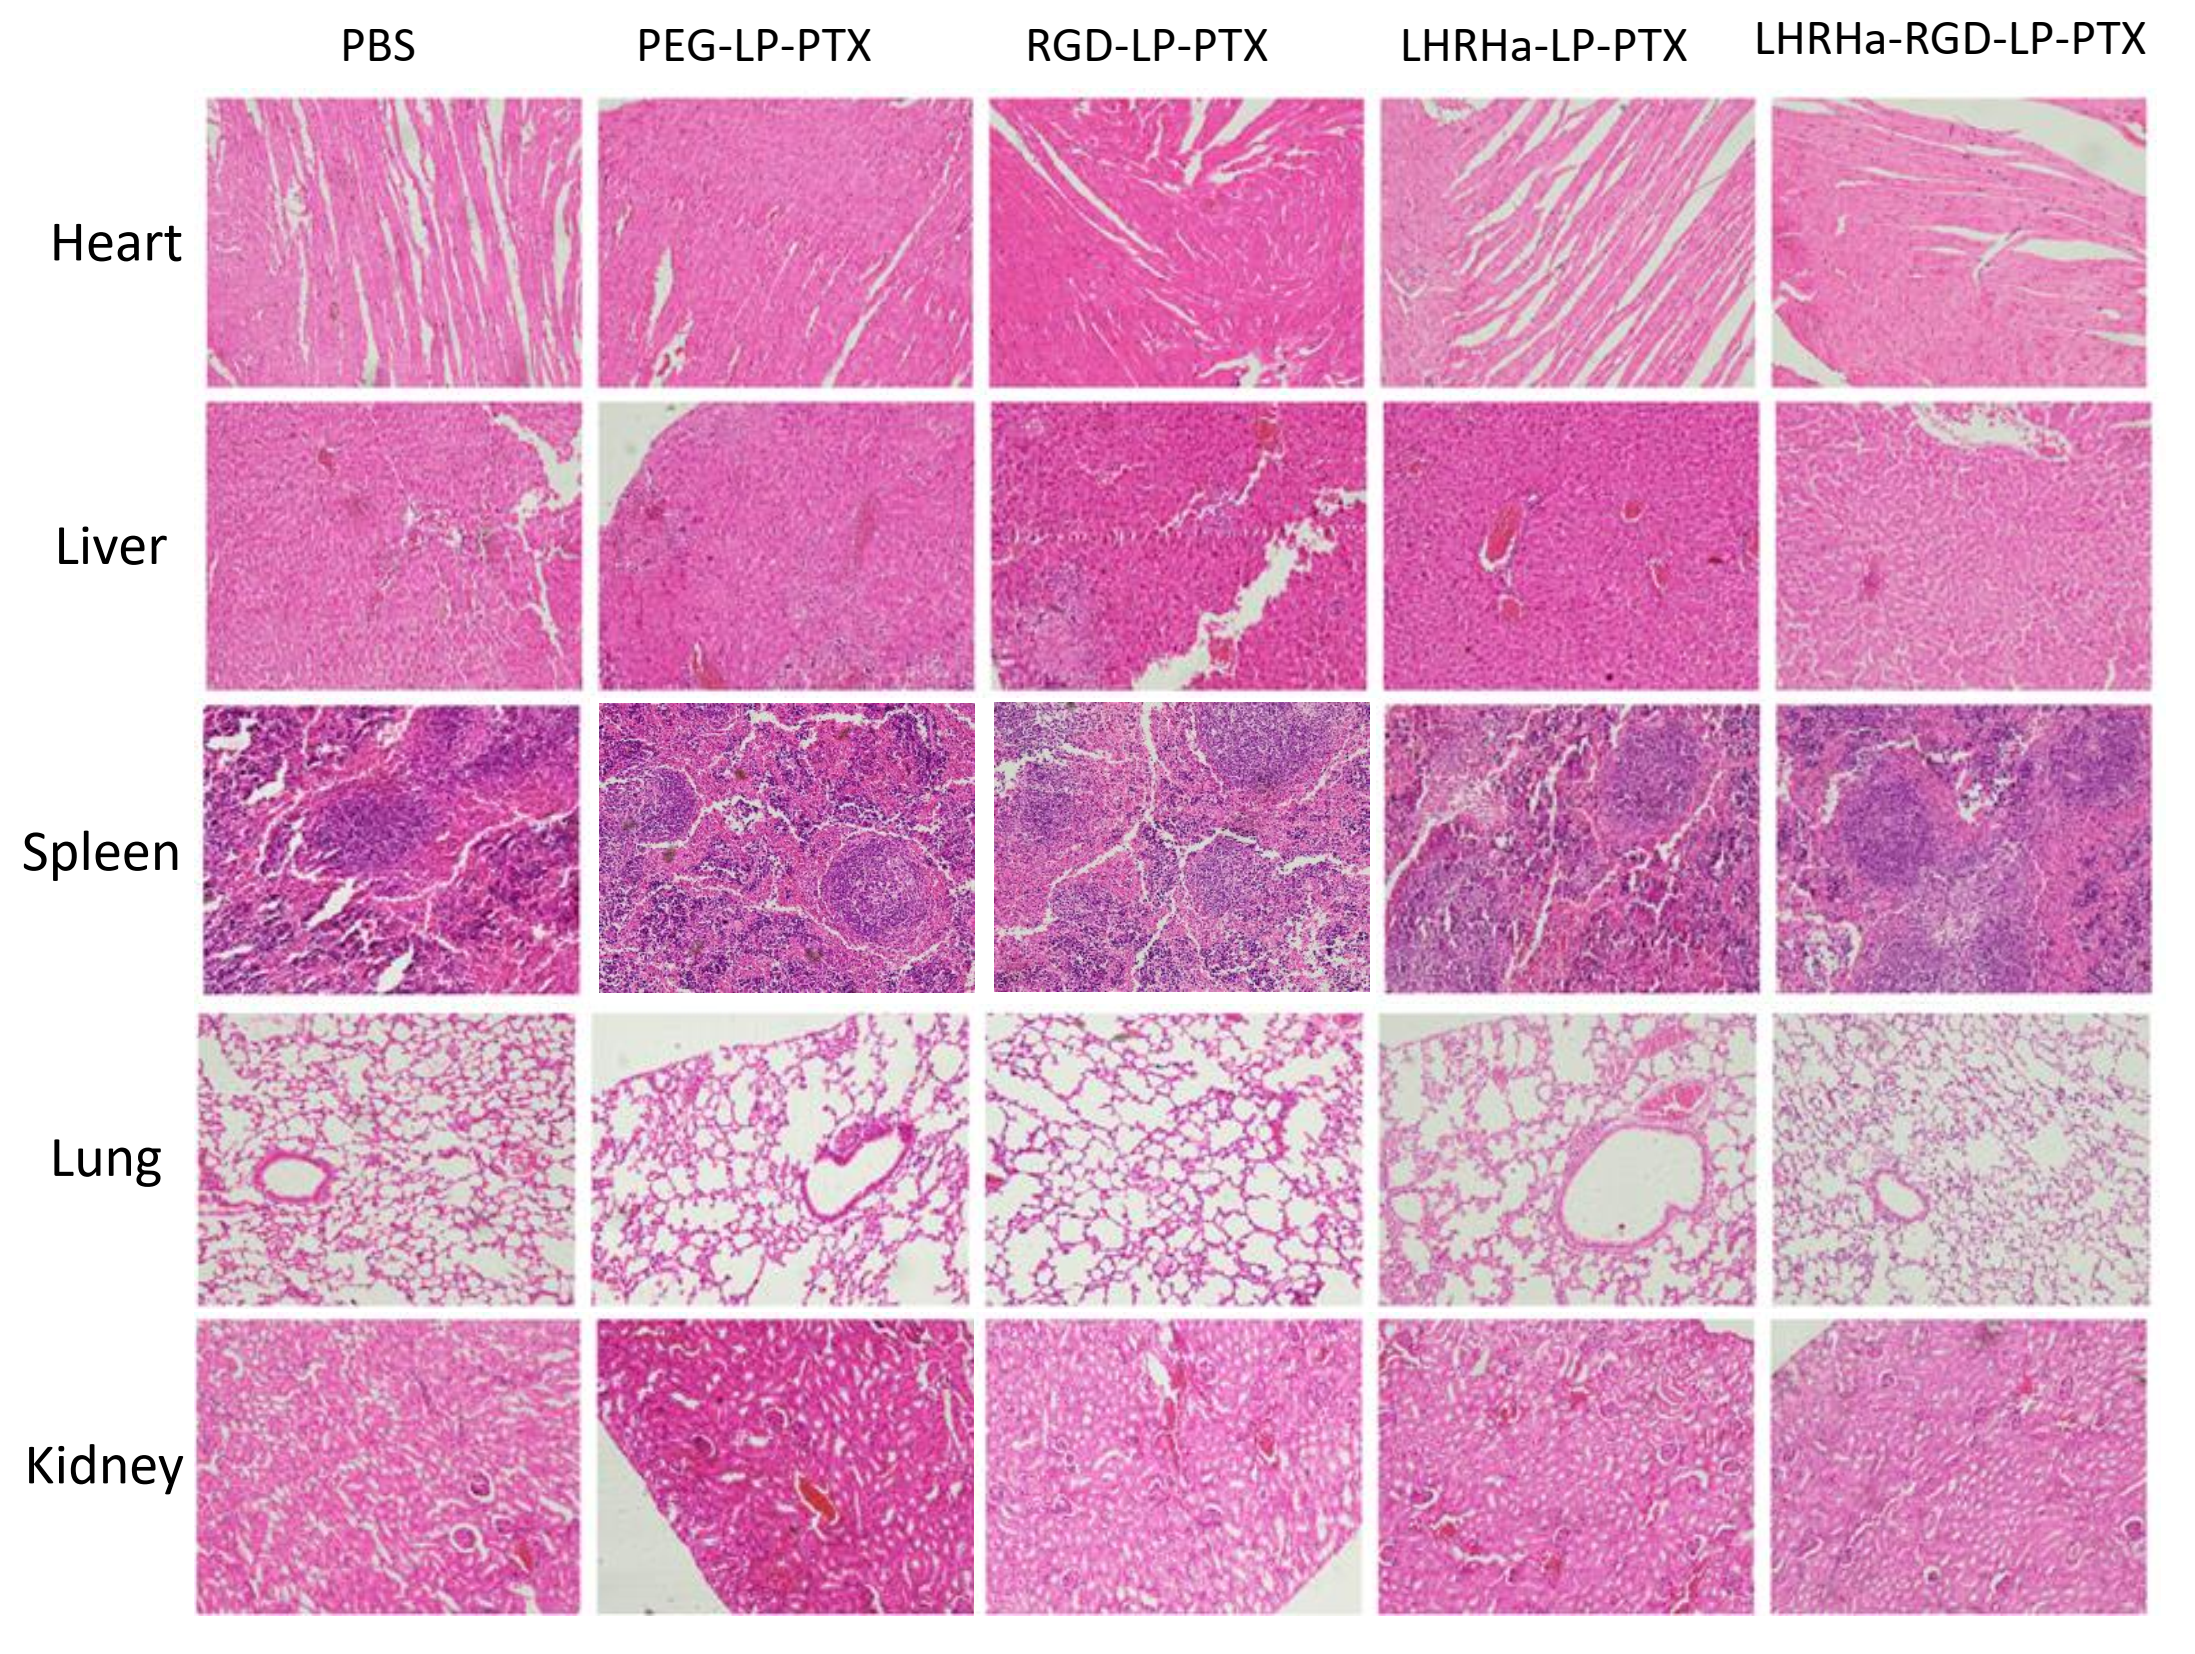


**Figure.S2** HE staining of heart, liver, spleen, lung and kidney tissue. Magnification X200
